# Supplementary material for: Evaluation of canonical Hedgehog signaling pathway inhibition in canine osteosarcoma
Source: PubMed Central journal article supplement (PMC7190150; doi:10.1371/journal.pone.0231762), 2020-04-29
Supplement: pone.0231762.s001.pdf [file pone.0231762.s001.pdf]

Figure 4B: Raw Data

- Canine OSA cell lines treated with vismodegib
- Image captured by chemiluminescence detection via digital imaging with Kodak Image Station

Raw Image for Figure 4B: Gli1 blot  
Anti-Gli1 antibody  
Abcam #49314  
1:500 dilution, ~160 kDa

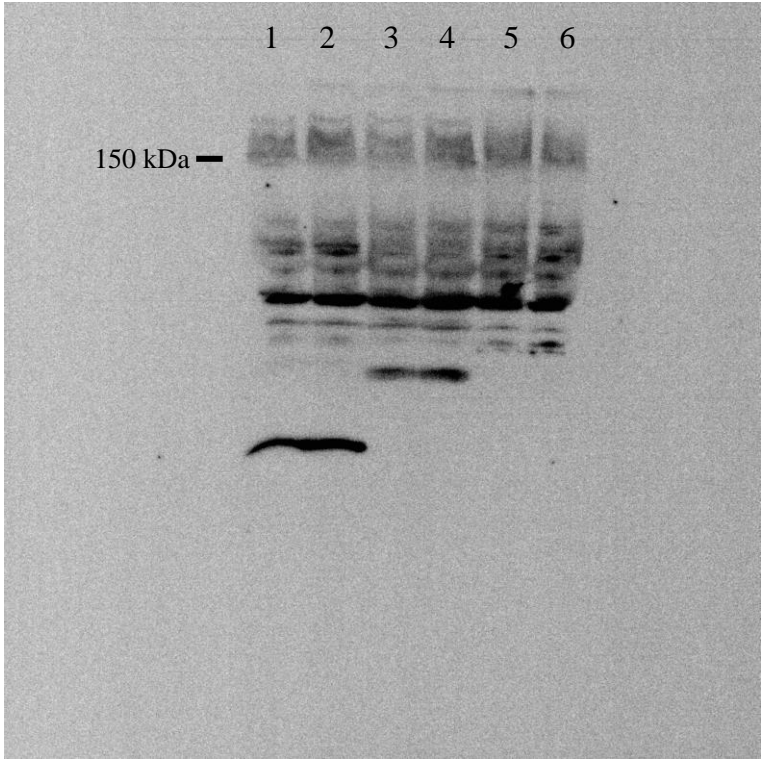

Raw Image for Figure 4B:  
Tubulin Loading Control for Gli1 blot  
Sigma #T9026  
1:5000 dilution, ~50 kDa

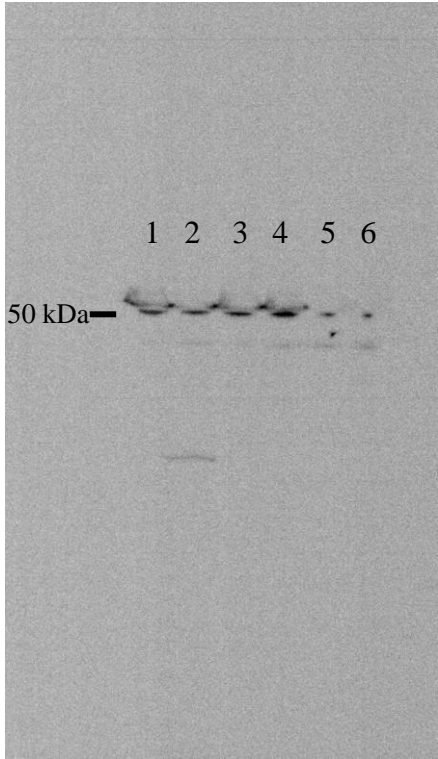

Key:

1. D-17 whole cell lysate, DMSO control treated
2. D-17 whole cell lysate, 45  $\mu$ M vismodegib treated
3. Abrams whole cell lysate, DMSO control treated
4. Abrams whole cell lysate, 30  $\mu$ M vismodegib treated
5. HMPOS whole cell lysate, DMSO control treated
6. HMPOS whole cell lysate, 30  $\mu$ M vismodegib treated

Figure 4B: Raw Data

- Canine OSA cell lines treated with vismodegib
- Image captured by chemiluminescence detection via digital imaging with Kodak Image Station

Raw Image for Figure 4B: Smo blot  
Anti-Smo antibody  
Abcam #ab236456  
1:500 dilution, ~86 kDa

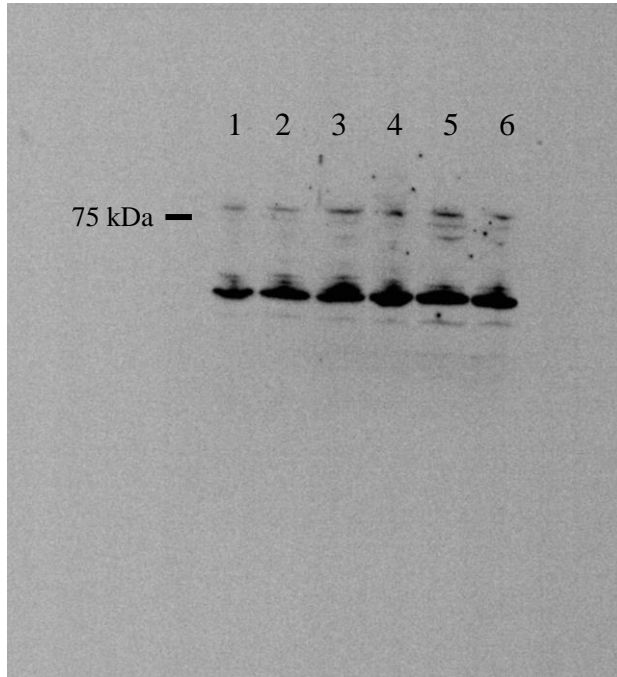

Raw Image for Figure 4B: Bmi1 blot  
Anti-Bmi1 antibody  
Cell Signaling #6964  
1:2000 dilution, ~45 kDa

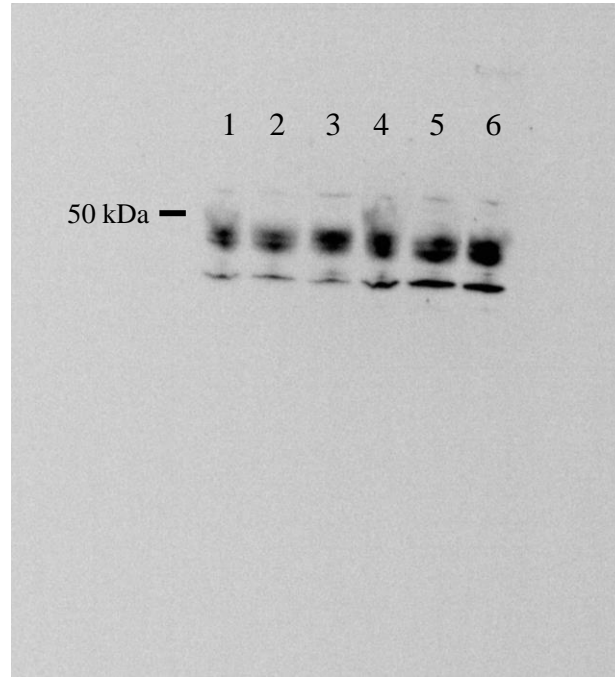

Raw Image for Figure 4B:  
Tubulin Loading Control for Smo/Bmi1 blot  
Sigma #T9026  
1:5000 dilution, ~50 kDa

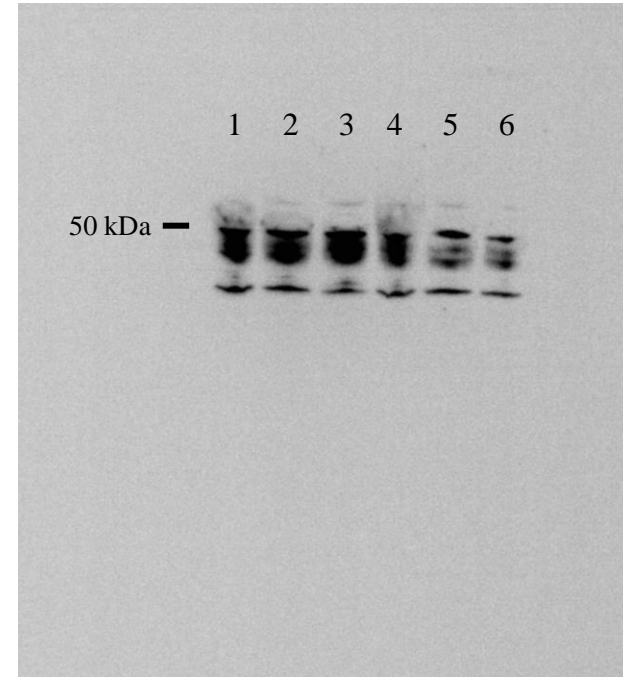

Key:

1. D-17 whole cell lysate, DMSO control treated
2. D-17 whole cell lysate, 45  $\mu$ M vismodegib treated
3. Abrams whole cell lysate, DMSO control treated
4. Abrams whole cell lysate, 30  $\mu$ M vismodegib treated
5. HMPOS whole cell lysate, DMSO control treated
6. HMPOS whole cell lysate, 30  $\mu$ M vismodegib treated

Figure 4B: Raw Data

- Canine OSA cell lines treated with vismodegib
- Image captured by chemiluminescence detection via digital imaging with Kodak Image Station

Raw Image for Figure 4B: Snai1 blot  
Anti-Snai1 antibody  
Cell Signaling #3879  
1:500 dilution, ~29 kDa

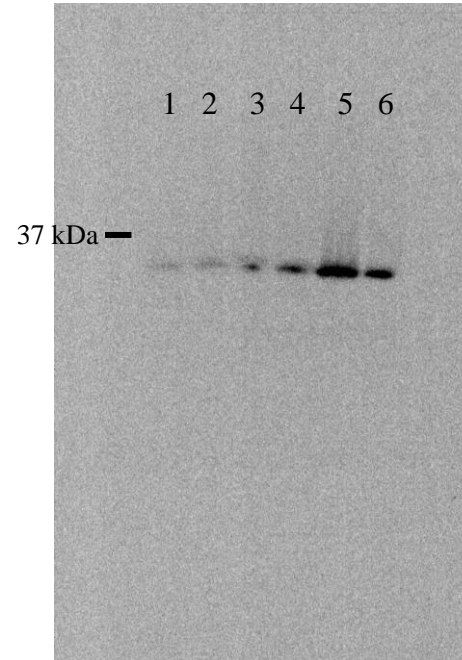

Raw Image for Figure 4B:  
Tubulin Loading Control for Gli1 blot  
Sigma #T9026  
1:5000 dilution, ~50 kDa

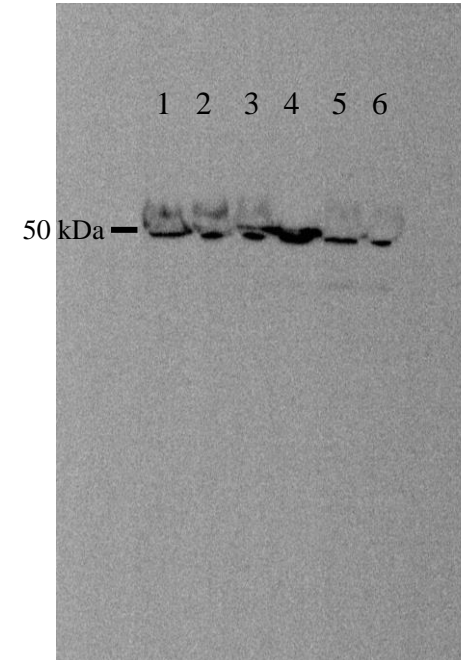

Key:

1. D-17 whole cell lysate, DMSO control treated
2. D-17 whole cell lysate, 45  $\mu$ M vismodegib treated
3. Abrams whole cell lysate, DMSO control treated
4. Abrams whole cell lysate, 30  $\mu$ M vismodegib treated
5. HMPOS whole cell lysate, DMSO control treated
6. HMPOS whole cell lysate, 30  $\mu$ M vismodegib treated

Raw Image for Figure 4B: Cleaved Caspase-3 blot  
 Anti-Cleaved Caspase-3 antibody  
 Cell Signaling #9661  
 1:1000 dilution, ~19 kDa

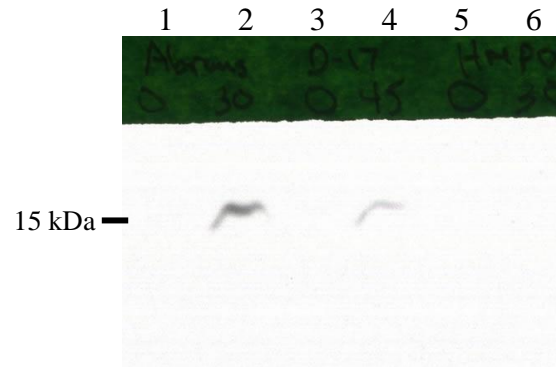

Raw Image for Figure 4B: Cleaved Caspase-7 blot  
 Anti-Cleaved Caspase-7 antibody  
 Cell Signaling #8438  
 1:1000 dilution, ~18 kDa

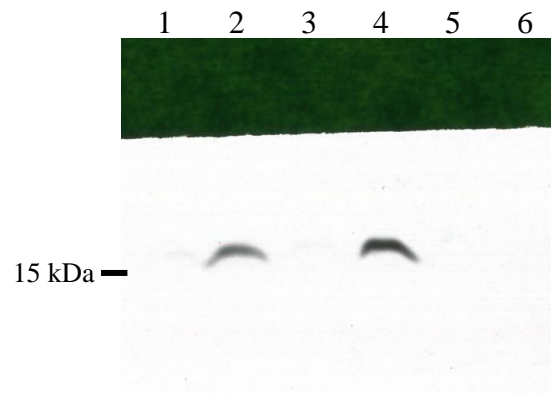

Raw Image for Figure 4B:  
 Tubulin Loading Control for Smo/Bmi1 blot  
 Sigma #T9026  
 1:5000 dilution, ~50 kDa

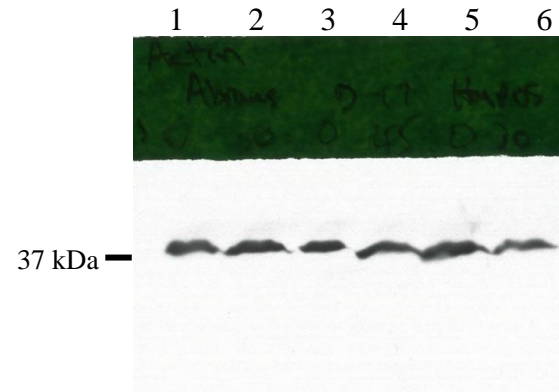

Raw Image for Figure 4B:  
 Tubulin Loading Control for Smo/Bmi1 blot  
 Sigma #T9026  
 1:5000 dilution, ~50 kDa

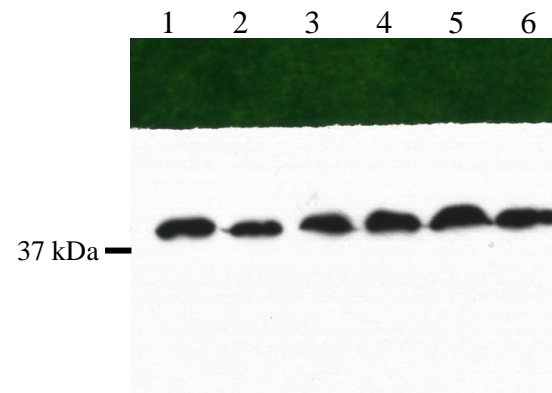

Figure 5B: Raw Data

- Canine OSA cell lines treated with vismodegib
- Image captured by chemiluminescence detection via radiographic film exposure; films scanned

Key:

1. Abrams whole cell lysate, DMSO control treated
2. Abrams whole cell lysate, 30  $\mu$ M vismodegib treated
3. D-17 whole cell lysate, DMSO control treated
4. D-17 whole cell lysate, 45  $\mu$ M vismodegib treated
5. HMPOS whole cell lysate, DMSO control treated
6. HMPOS whole cell lysate, 30  $\mu$ M vismodegib treated
